# Supplementary figures and images for: Physiologically‐Based Pharmacokinetic Modeling vs. Allometric Scaling for the Prediction of Infliximab Pharmacokinetics in Pediatric Patients
Source: PubMed Central journal article supplement — CPT Pharmacometrics Syst Pharmacol. 2019 Oct 19;8(11):835–44. doi: 10.1002/psp4.12456 (PMC6875711; doi:10.1002/psp4.12456), 2019-10-19

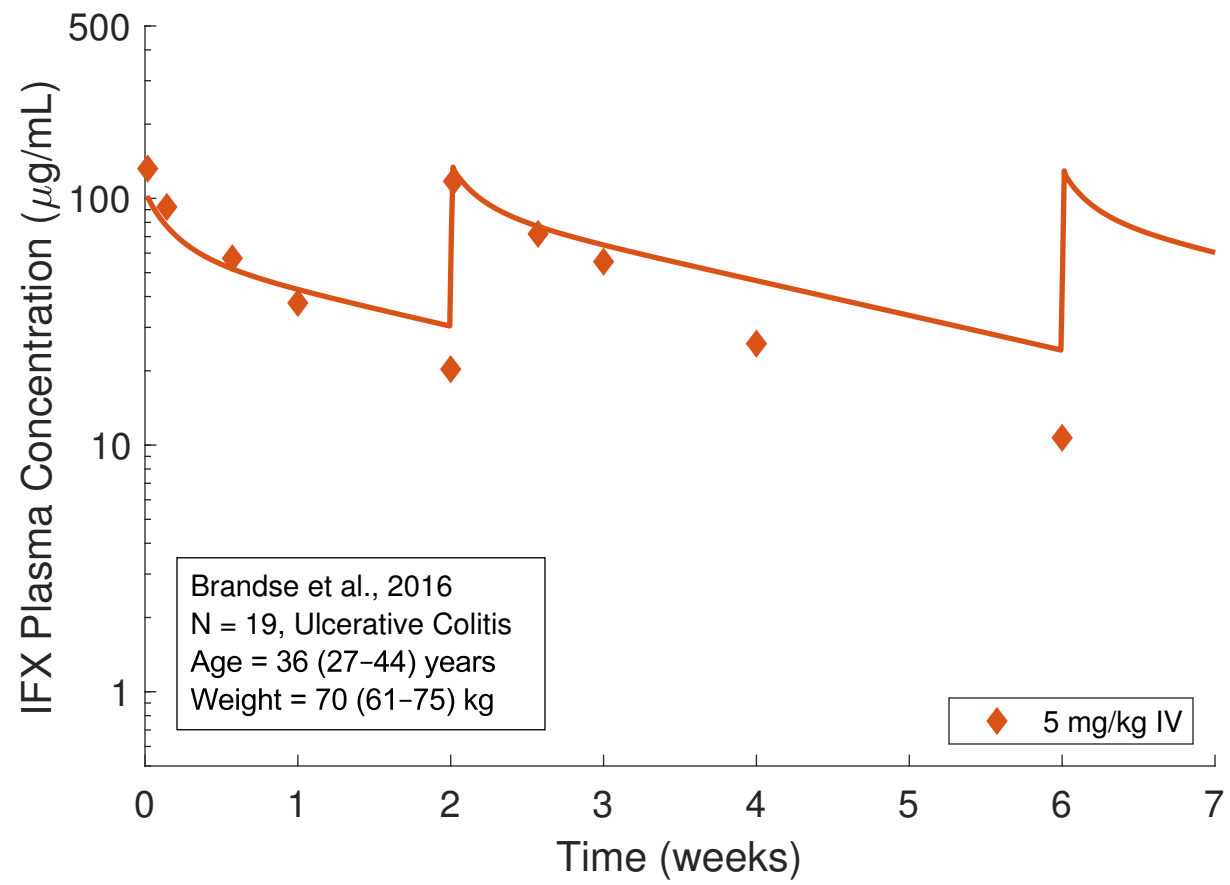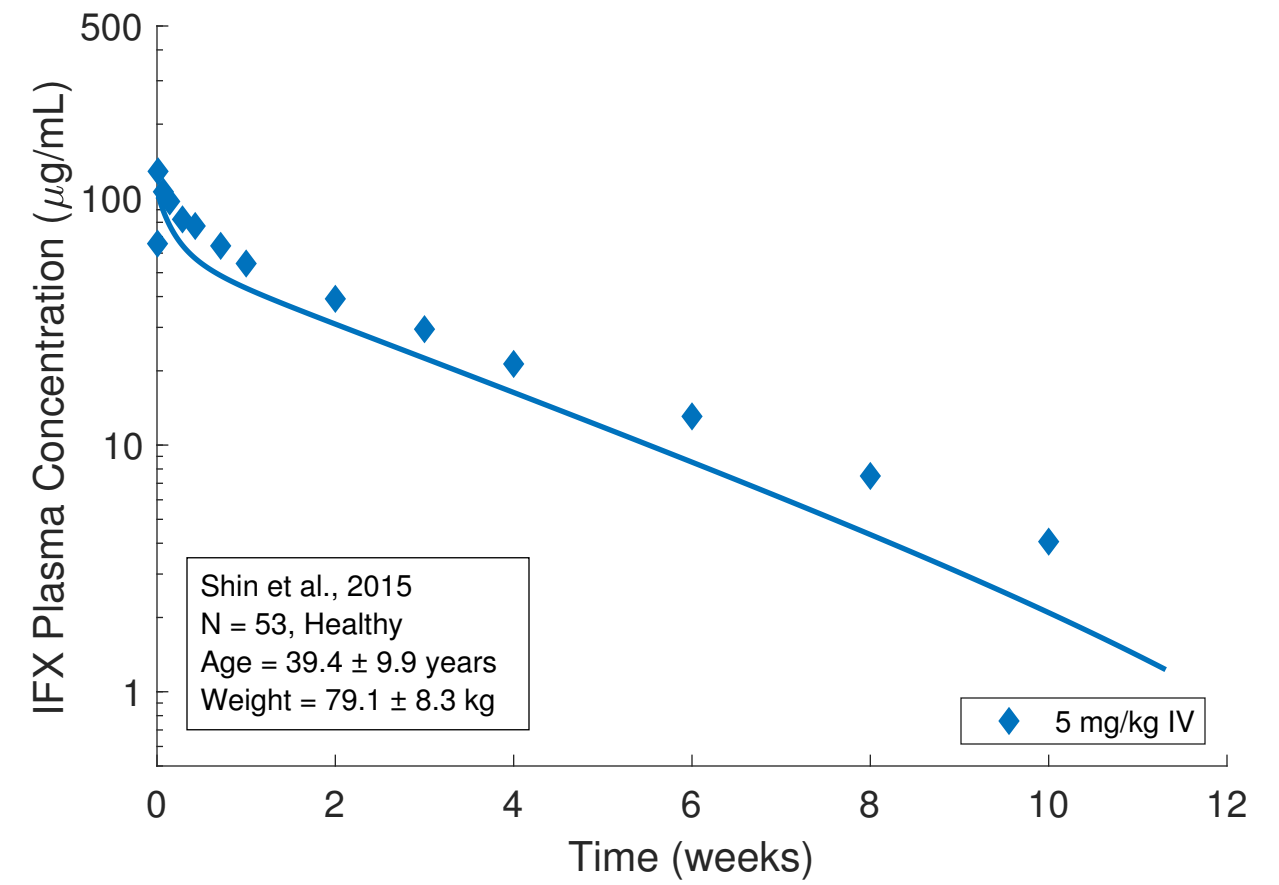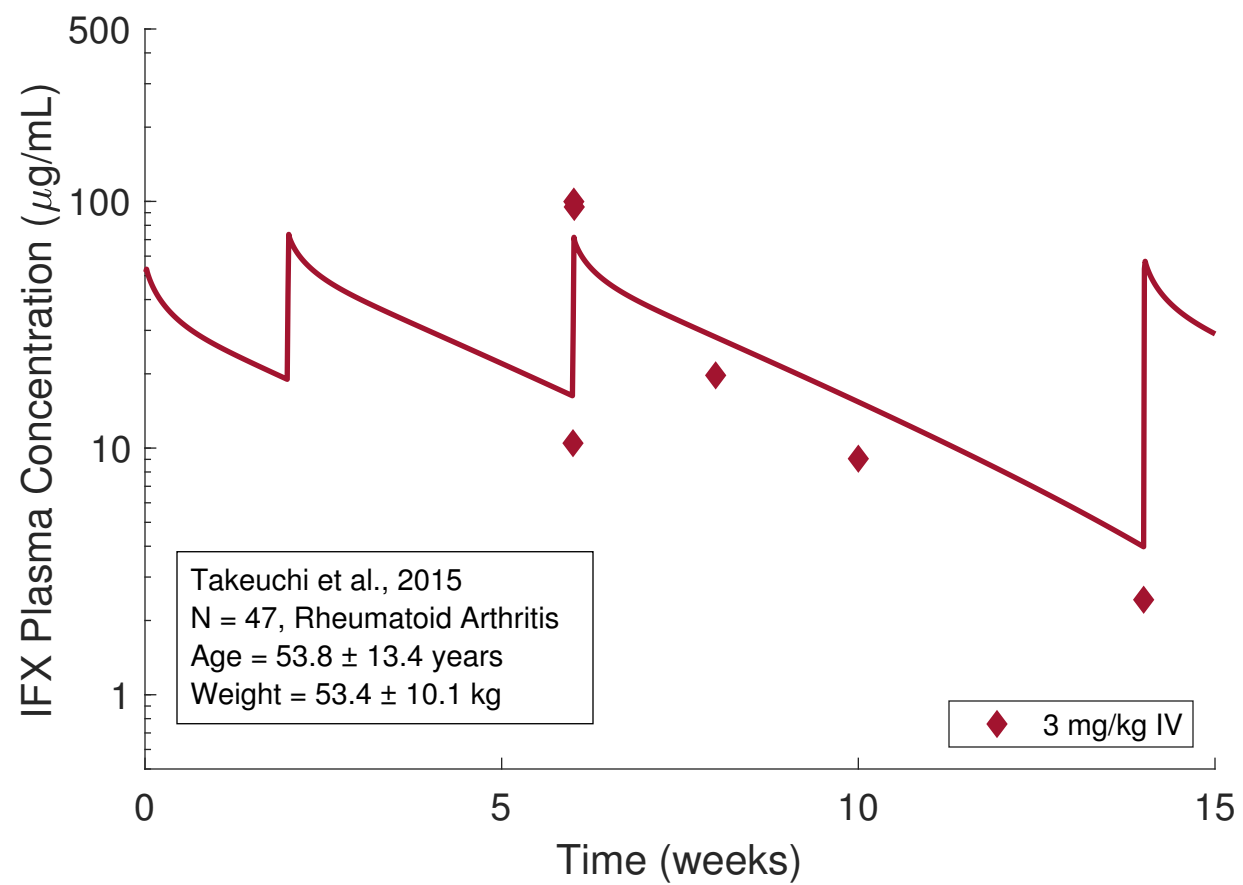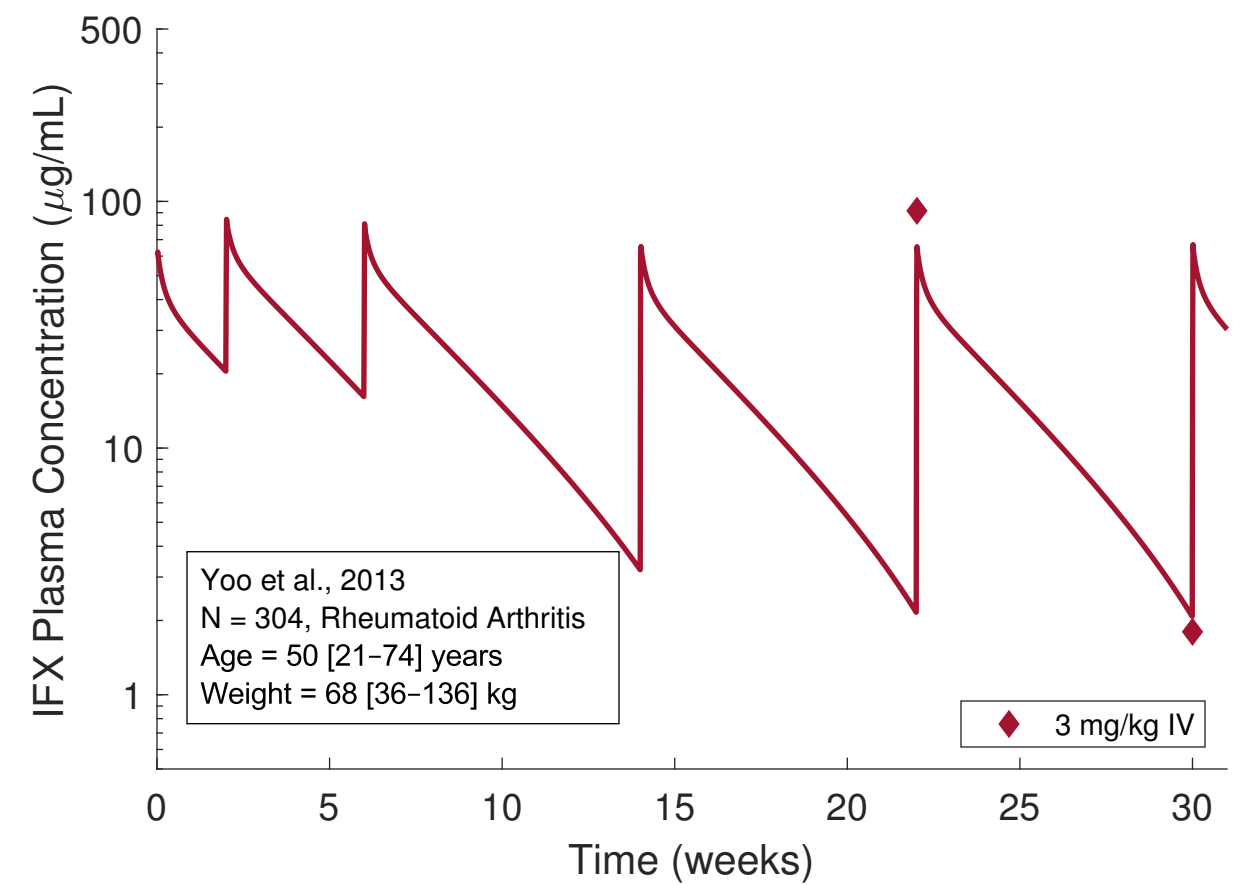

Supplement: PSP4-8-835-s001.pdf [file PSP4-8-835-s001.pdf]

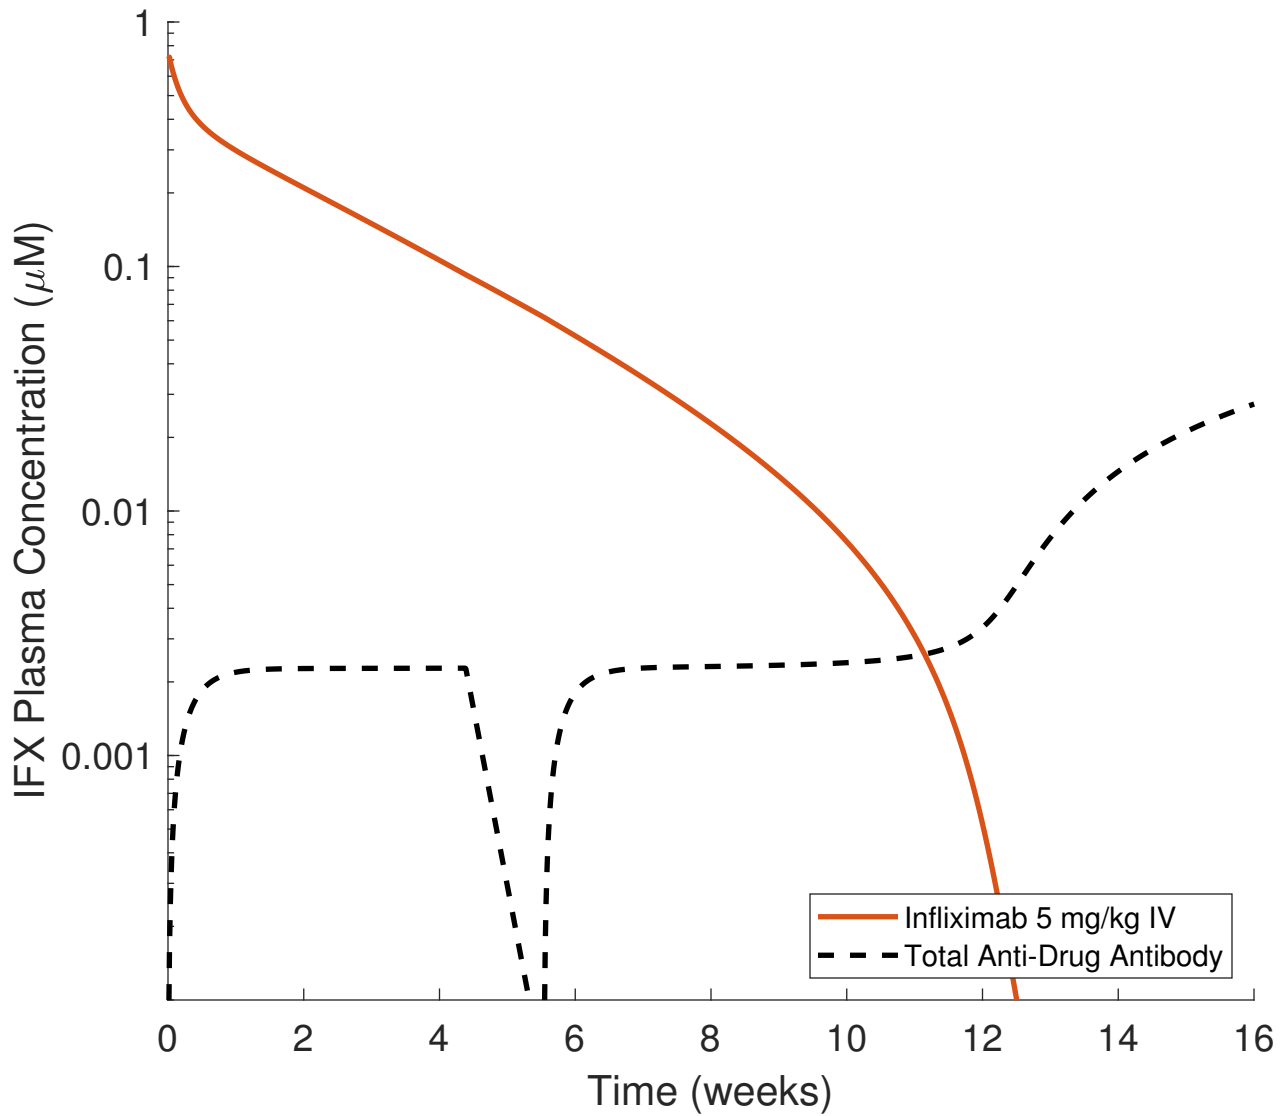

Supplement: PSP4-8-835-s002.pdf [file PSP4-8-835-s002.pdf]
